# Supplementary material
Source: PubMed Central journal article supplement (PMC5971472)
Supplement: JB.00105-18_zjb012184779s1.pdf [file JB.00105-18_zjb012184779s1.pdf]

Table S1: Biolog comparison of *B. abortus* 2308 vs. *B. abortus* 2308::DybeY

| Plate | Substrate in Well                 |
|-------|-----------------------------------|
| 1     | D,L-Malic Acid                    |
| 1     | L-Malic Acid                      |
| 2A    | Laminarin                         |
| 2A    | Butyric Acid                      |
| 2A    | Caproic Acid                      |
| 10    | pH4.5 + Methionine                |
| 10    | pH4.5+L-Norvaline                 |
| 12B   | Dodecyltrimethyl ammonium bromide |
| 14A   | Fusaric acid                      |
| 14A   | Promethazine                      |
| 15B   | Alexidine                         |
| 16A   | Dichlofluanid                     |
| 16A   | 1-Chloro-2,4-dinitrobenzene       |
| 16A   | Chloroxylenol                     |
| 17A   | Phenylarsine oxide                |
| 18C   | Sodium m-periodate                |
| 18C   | 2-Phenylphenol                    |
| 18C   | Lidocaine                         |
| 18C   | Antimony (III) chloride           |
| 18C   | Pentachloro-phenol                |
| 18C   | Azathioprine                      |
| 19    | Josamycin                         |
| 19    | Phenethicillin                    |
| 19    | Lawsone                           |
| 20B   | Thioridazine                      |
| 20B   | Patulin                           |
| 20B   | Tetrazolium violet                |

Biolog Phenotype Microarray analysis was performed by inoculating Biolog Phenotype Microarray plates with  $10^8$  CFU/well and incubated at 37°C for 84 hours. Each well was measured by spectroscopy, O.D. 590 nm. Substrates listed include differences in growth between *B. abortus* 2308 and the *ybeY* deletion strain. Cells highlighted in green indicate better growth by *ybeY* deletion strain compared to the parental strain, and cells highlighted in red indicated better growth in the parental strain compared to the *ybeY* deletion strain.

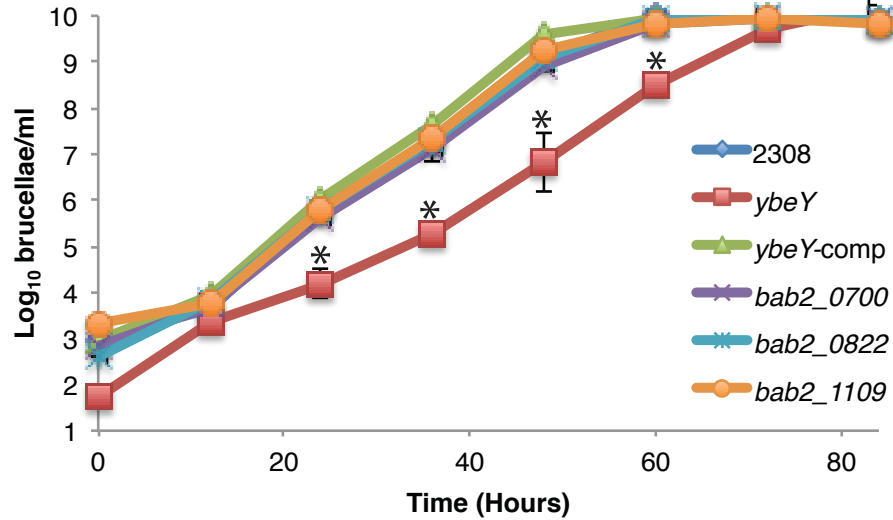

**Figure S1. Growth kinetics of *B. abortus* 2308 deletion strains.**

Growth curve of *Brucella abortus* strains in rich medium. *B. abortus* 2308, *B. abortus* 2308:: $\Delta ybeY$ , and *B. abortus* 2308:: $\Delta ybeY$ -comp, *B. abortus* 2308:: $\Delta bab2_{0700}$ , *B. abortus* 2308:: $\Delta bab2_{0822}$ , *B. abortus* 2308:: $\Delta bab2_{1109}$ , were grown in brucella broth and colony forming units/ml was monitored by serial dilution. The asterisk (\*) denotes a statistically significant difference ( $P < 0.05$ ) between the *ybeY* deletion strain and the parental strain 2308. There was no significant difference between the *ybeY*-complemented strain, the *bab2\_{0700}*, *bab2\_{0822}*, or *bab2\_{1109}* deletion strains and the parental strain 2308.
